# Supplementary material for: SEPT9: From pan-cancer to lung squamous cell carcinoma
Source: PubMed Central journal article supplement — BMC Cancer. 2024 Sep 5;24:1105. doi: 10.1186/s12885-024-12877-4 (PMC11375884; doi:10.1186/s12885-024-12877-4), 2024-09-05
Supplement: 12885_2024_12877_MOESM1_ESM.pdf [file 12885_2024_12877_MOESM1_ESM.pdf]

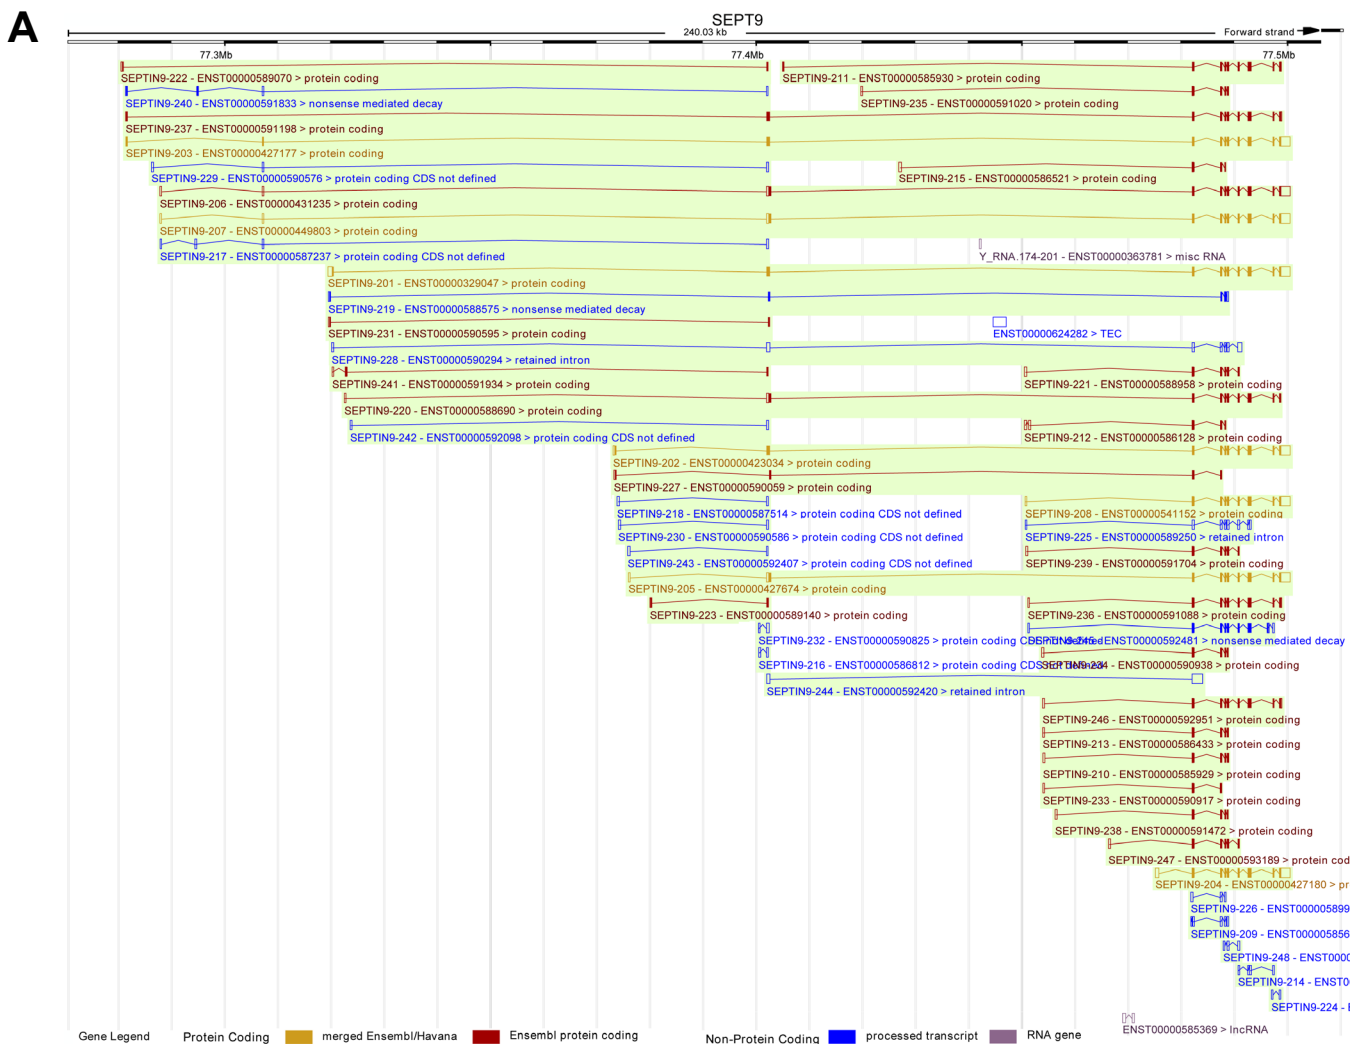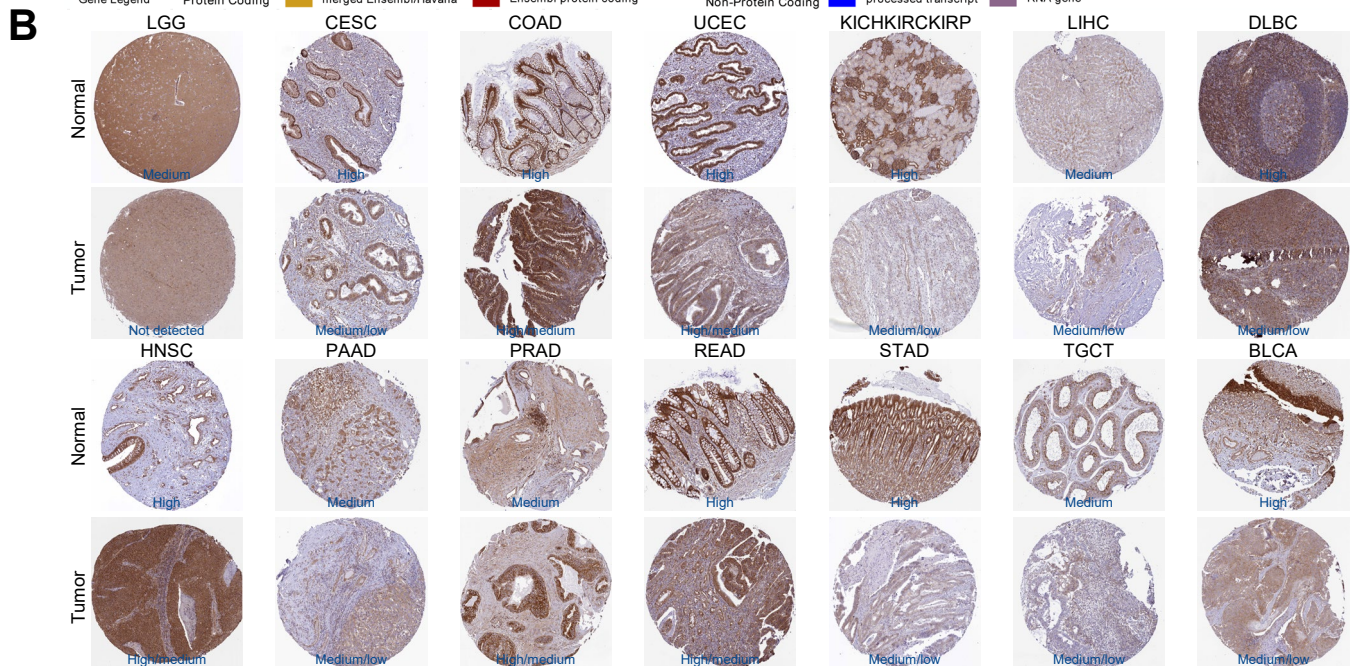

**Fig. S1.** The transcripts of human *SEPT9* and protein expression inconsistent with mRNA expression in several tumors. Related to Fig. 2A, I. (A) Location of 48 different transcripts of human *SEPT9* gene in Chromosome 17. (B) Representative immunohistochemical staining of *SEPT9* protein from HPA portal.

**A**

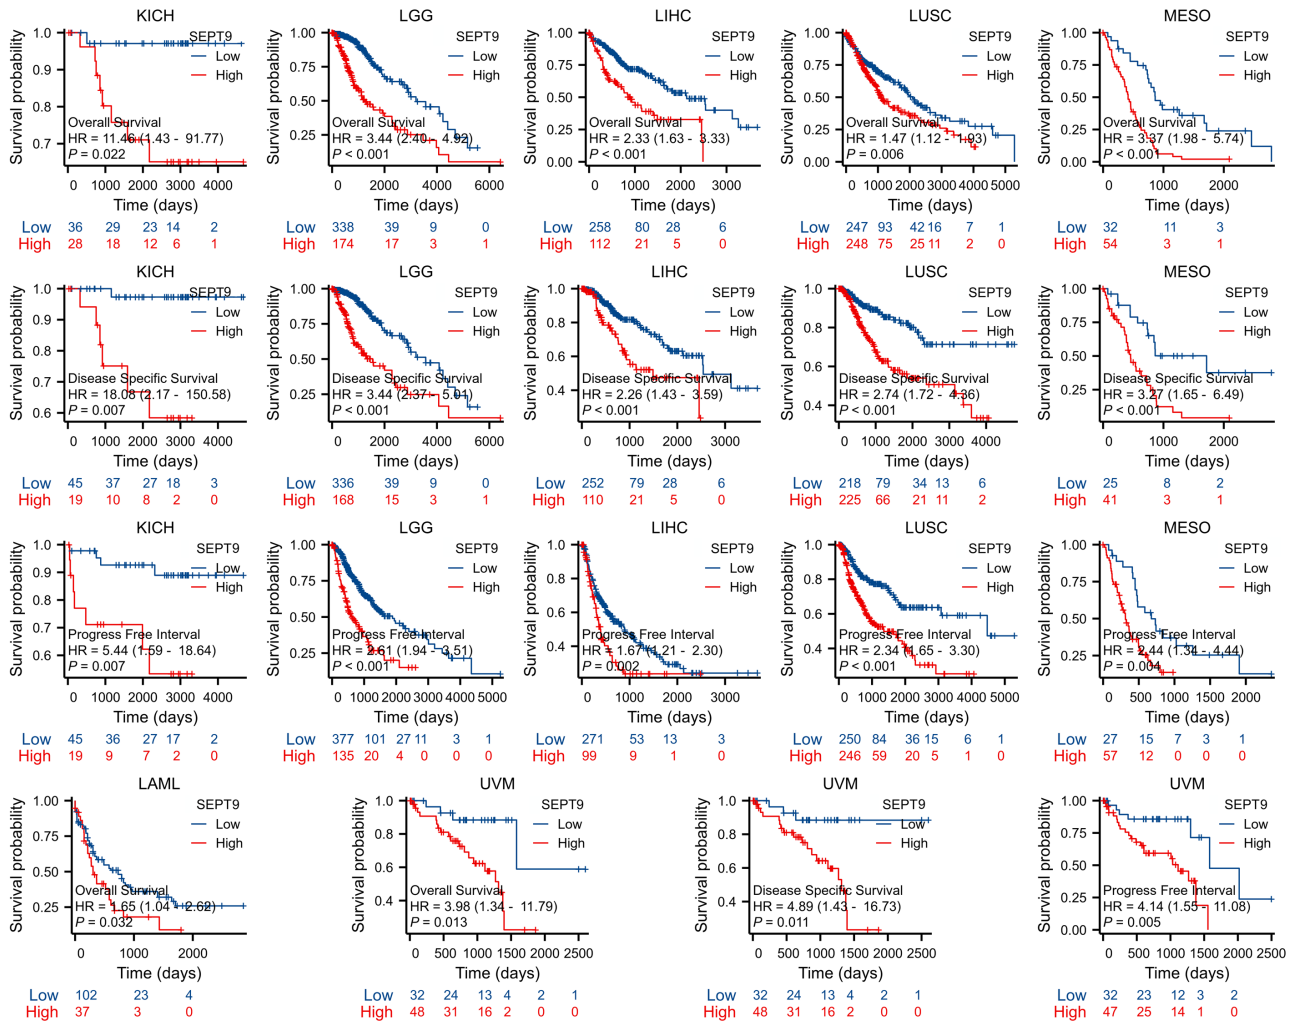

**Fig. S2.** The prognostic role of *SEPT9* in pan-cancer with TCGA datasets. Related to Fig. 4C. (A) The OS, DSS, and PFI curves with significant prognostic value according to *SEPT9* level.

**A**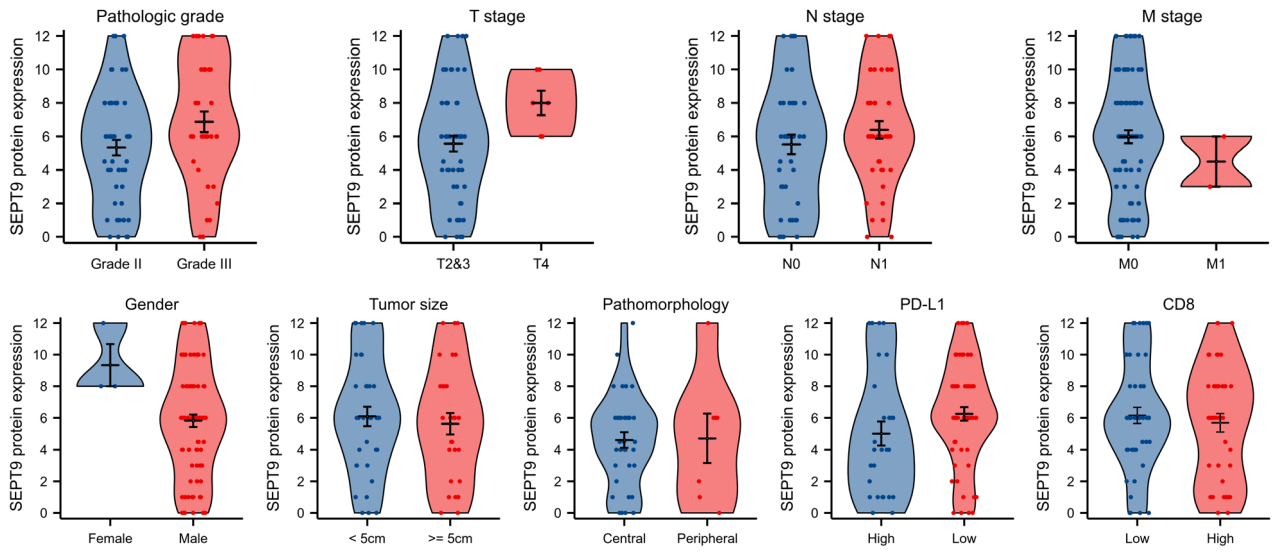

**Fig. S3.** Clinical correlation of SEPT9 protein with no significant difference. Related to Fig. 4J. **(A)** Correlation of SEPT9 protein expression with pathologic grade, T, N, M stage, gender, tumor size, pathomorphology, PD-L1, and CD8.
